# Supplementary material for: Efficacy and safety of calcium polystyrene sulfonate in patients with hyperkalemia and stage 3–5 non-dialysis chronic kidney disease: a single-center randomized controlled trial
Source: PubMed Central journal article supplement — J Int Med Res. 2023 Apr 16;51(4):03000605231167516. doi: 10.1177/03000605231167516 (PMC10119845; doi:10.1177/03000605231167516), 2023-04-16
Supplement: sj-pdf-2-imr-10.1177_03000605231167516.pdf [file sj-pdf-2-imr-10.1177_03000605231167516.pdf]

## 南京军区南京总医院伦理委员会审查批件

批件号：2014ZFYJ-002

|                                                                                                                                                                                                                                                                                                                   |                                                                                                                             |      |                                                                        |
|-------------------------------------------------------------------------------------------------------------------------------------------------------------------------------------------------------------------------------------------------------------------------------------------------------------------|-----------------------------------------------------------------------------------------------------------------------------|------|------------------------------------------------------------------------|
| 项目名称                                                                                                                                                                                                                                                                                                              | 聚苯乙烯磺酸钙对慢性肾脏病患者血钾水平的影响                                                                                                      |      |                                                                        |
| 申办单位                                                                                                                                                                                                                                                                                                              |                                                                                                                             |      |                                                                        |
| 主要研究者/研究单位                                                                                                                                                                                                                                                                                                        | 章海涛/南京军区南京总医院国家肾脏疾病临床医学研究中心                                                                                                 |      |                                                                        |
| 项目类别                                                                                                                                                                                                                                                                                                              | 研究者发起临床研究                                                                                                                   | 项目分期 |                                                                        |
| 审查类别                                                                                                                                                                                                                                                                                                              | 初始审查                                                                                                                        | 审查方式 | <input checked="" type="checkbox"/> 会议审查 <input type="checkbox"/> 快速审查 |
| 审查委员                                                                                                                                                                                                                                                                                                              | 详见附表                                                                                                                        |      |                                                                        |
| 审查文件                                                                                                                                                                                                                                                                                                              | 1. 临床试验初次审查申请表<br>2. 临床试验方案（版本号：1.0，日期：2014年4月）<br>3. 病例报告表（版本号：1.0，日期：2014年4月）<br>4. 知情同意书（版本号：1.0，日期：2014年4月）<br>5. 研究者简历 |      |                                                                        |
| <b>审查意见</b>                                                                                                                                                                                                                                                                                                       |                                                                                                                             |      |                                                                        |
| <p>经本伦理委员会审查，同意按所批准的临床研究方案、知情同意书开展本项研究，请遵循 GCP 的原则及本伦理委员会批准的方案开展临床研究，保护受试者的权益。</p> <p>研究过程中发生主要研究者变更，临床试验方案、知情同意书的修改，应提交修正案审查申请。</p> <p>发生严重不良事件时，须及时提交严重不良事件报告。</p> <p>按规定的年度/定期跟踪审查频率，及时提前 1 月递交研究进展报告。</p> <p>试验过程中若发生违背试验方案或 GCP 原则，及时提交违背方案报告。</p> <p>申请人暂停或提前终止临床研究，及时提交暂停/终止研究报告。</p> <p>试验完成，应递交结题报告。</p> |                                                                                                                             |      |                                                                        |
| 审查频率                                                                                                                                                                                                                                                                                                              | <input type="checkbox"/> 3 个月 <input checked="" type="checkbox"/> 6 个月 <input type="checkbox"/> 12 个月                       |      |                                                                        |
| 主任委员签名                                                                                                                                                                                                                                                                                                            | 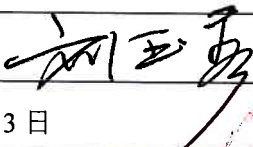                                         |      |                                                                        |
| 批准日期                                                                                                                                                                                                                                                                                                              | 2014 年 5 月 13 日                                                                                                             |      |                                                                        |
| 伦理委员会                                                                                                                                                                                                                                                                                                             | 南京军区南京总医院临床试验伦理委员会（盖章）<br>              |      |                                                                        |

声明：本伦理委员会的组成及工作程序符合国家食品药品监督管理局颁布的“药物临床试验质量管理规范”（2003 年 8 月 6 日）中的相关要求及其所遵循的 ICH 临床试验指导原则。

伦理委员会地址：江苏省南京市中山东路 305 号，南京军区南京总医院；邮编 210002

联系人：曹晓梅；联系电话：025-80863234
